# Supplementary material for: The Use of POSS-Based Nanoadditives for Cable-Grade PVC: Effects on Its Thermal Stability
Source: Polymers (Basel). 2019 Jun 29;11(7):1105. doi: 10.3390/polym11071105 (PMC6681030; doi:10.3390/polym11071105)
Supplement: Supplementary file 1 [file polymers-11-01105-s001.pdf]

## Supplementary Information file of the paper

### The use of POSS-based nanoadditives for Cable-grade PVC: effects on the thermal stability

Luca Palin<sup>1,2</sup>, Giuseppe Rombolà<sup>1,2</sup>, Marco Milanese<sup>1,2</sup>, Enrico Boccaleri<sup>\*1,2</sup>

<sup>1</sup>Dipartimento di Scienze ed Innovazione Tecnologica (DiSIT), Università del Piemonte Orientale, Viale T. Michel, 11, 15121 Alessandria (I)

<sup>2</sup>Nova Res S.r.l., Via D. Bello, 3, 28100 Novara (I)

Correspondence should be addressed to Enrico Boccaleri; enrico.boccaleri@uniupo.it

Identification of commercial additives reported in Table 1.

Atomfor S is a calcium carbonate coated with stearic acid produced by Omya

Chloroparaffins are chlorinated paraffins containing 52% wt. of Cl named Cereclor and produced by Ineos

Epoxidized soybean oil (ESBO) is a plasticizer and a scavenger for hydrochloric acid produced by KH Chemicals

Jayflex<sup>TM</sup> DINP plasticizer is the largest-volume general-purpose high-molecular-weight plasticizer for PVC, produced by ExxonMobil Chemical

Calcium and Mg stearate and stearic acid are heat stabilisers and are produced by Baerlocher

Sb<sub>2</sub>O<sub>3</sub> is a flame retardant produced by Biesterfeld Spezialchemie

Realube is a lubricant (basically a paraffinic wax) produced by Reagens

Irganox is a commercial antioxidant additive (based on hindered phenolic compounds) produced by BASF

Table S1: Torque value during extrusion with different PVC nanocomposite formulations.

| Coding         | Screw speed<br>rpm | Motor Torque<br>% |
|----------------|--------------------|-------------------|
| REF            | 90                 | 35                |
| IBuPOSSOH_1.25 | 90                 | 17                |
| REF            | 150                | 24                |
| IBuPOSSOH_1.25 | 148                | 20                |
| PhPOSSOH_2.5   | 150                | 22                |
| IBuPOSSOH_0.62 | 150                | 22                |
| PhPOSSOH_0.62  | 151                | 22                |
| VyPOSS_0.62    | 145                | 22                |
| GlyPOSS_0.62   | 149                | 22                |
| X-ZEO_0.31     | 153                | 24                |

|                         |     |    |
|-------------------------|-----|----|
| X-ZEO_0.62              | 149 | 26 |
| X-ZEO_0.31/GlyPOSS_0.62 | 152 | 20 |
| X-ZEO_0.62/GlyPOSS_0.62 | 149 | 22 |
| X-ZEO_1.25/GlyPOSS_0.62 | 150 | 25 |
| HTLC_5                  | 156 | 24 |
| HTLC_5/GlyPOSS_0.62     | 150 | 23 |
| HLTC_5/VyPOSS_0.62      | 151 | 24 |

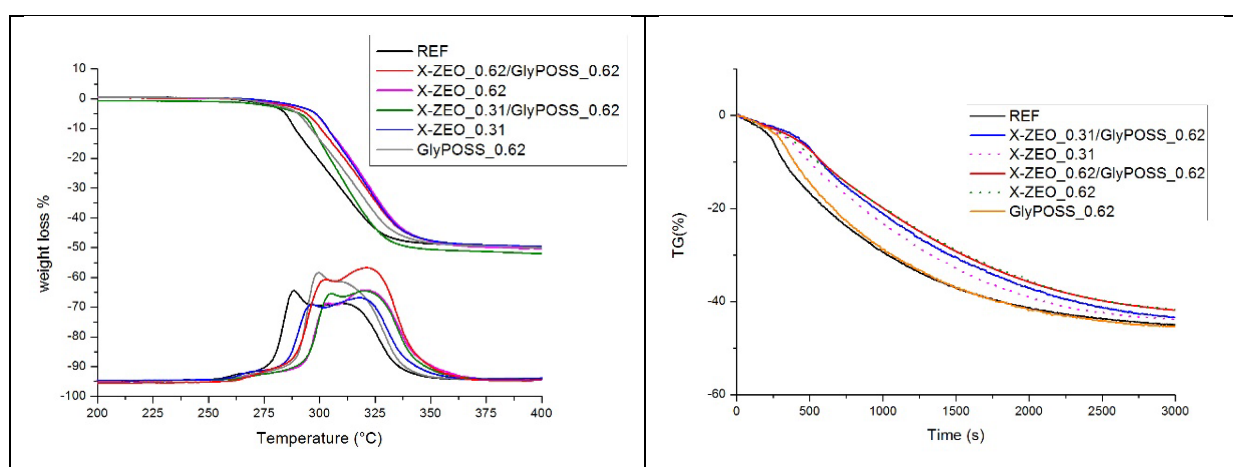

Figure S1: TGA analyses of reference P-PVC and X-type zeolite and X-type zeolite/GlyPOSS formulations in the compositional range 0.31–0.62 phr, in ramp heating 10°C/min, Ar flow (20 mL/min) from RT to 800°C (left) and isothermal measurements (Ar, 265°C) (right).

Table S2: Mechanical properties for tensile test and hardness test.

|                         | Tensile Modulus<br>(MPa) | Stress at break<br>(MPa) | Strain at break<br>(%) | Hardness<br>Sh. A, 15'' |
|-------------------------|--------------------------|--------------------------|------------------------|-------------------------|
| REF                     | 10.00 ±0.33              | 13.8±0.13                | 320±3.5                | 80.0±1.6                |
| X-ZEO_0.31              | 9.57±0.13                | 13.2±0.90                | 310±15                 | 77.5±1.5                |
| X-ZEO_0.62              | 9.69±0.56                | 13.2±1.26                | 310±12                 | 77.5±1.5                |
| X-ZEO_0.31/GlyPOSS_0.62 | 8.81±0.18                | 13.2±0.16                | 330±6.3                | 77.0±1.5                |
| X-ZEO_0.62/GlyPOSS_0.62 | 8.44±0.27                | 12.4±0.77                | 310±6.8                | 78.0±1.5                |
| IBuPOSSOH_0.62          | 8.93±0.13                | 13.6±0.32                | 320±2.1                | 77.5±1.5                |
| PhPOSSOH_0.62           | 8.95±0.18                | 13.0±0.13                | 320±1.6                | 78.0±1.5                |

|                         |           |           |          |          |
|-------------------------|-----------|-----------|----------|----------|
| VyPOSSOH_0.62           | 8.91±0.14 | 13.0±0.01 | 310±1.4  | 81.0±1.6 |
| GlyPOSS_0.62            | 8.87±0.10 | 13.5±0.32 | 320±6.6  | 79.5±1.6 |
| HTLC_5/GlyPOSS_0.62     | 9.35±0.18 | 12.5±0.14 | 310±0.92 | 80.0±1.6 |
| X-ZEO_1.25/GlyPOSS_0.62 | 9.12±0.01 | 12.3±0.05 | 300±2.3  | 77.0±1.5 |
| HTLC_5/VyPOSS_0.62      | 9.44±0.01 | 12.7±0.01 | 310±0.0  | 81.5±1.7 |
